# Supplementary material for: Fabrication of highly conductive, flexible, and hydrophobic Kevlar®@Ni–P–B@Cu@CS fabric with excellent self-cleaning performance for electromagnetic interference shielding
Source: Royal Society of Chemistry journal article supplement (doi:10.1039/d3dt04291j), 2024-01-01
Supplement: d3dt04291j1.pdf [file d3dt04291j1.pdf]

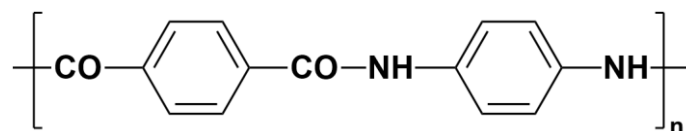

Fig. S1 Molecular structural formula of PPTA.

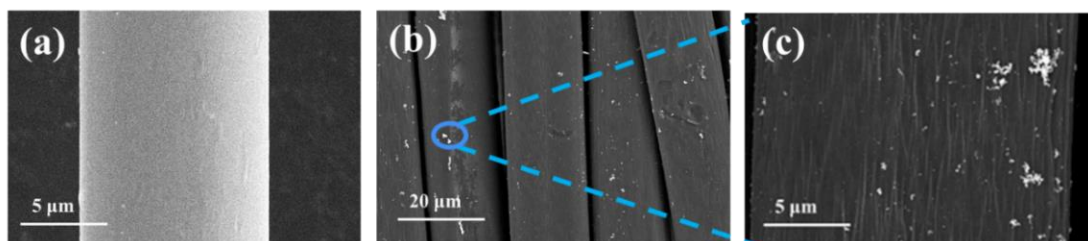

Fig. S2 SEM images of (a) pristine Kevlar<sup>®</sup>; (b-c) pretreated Kevlar<sup>®</sup>.

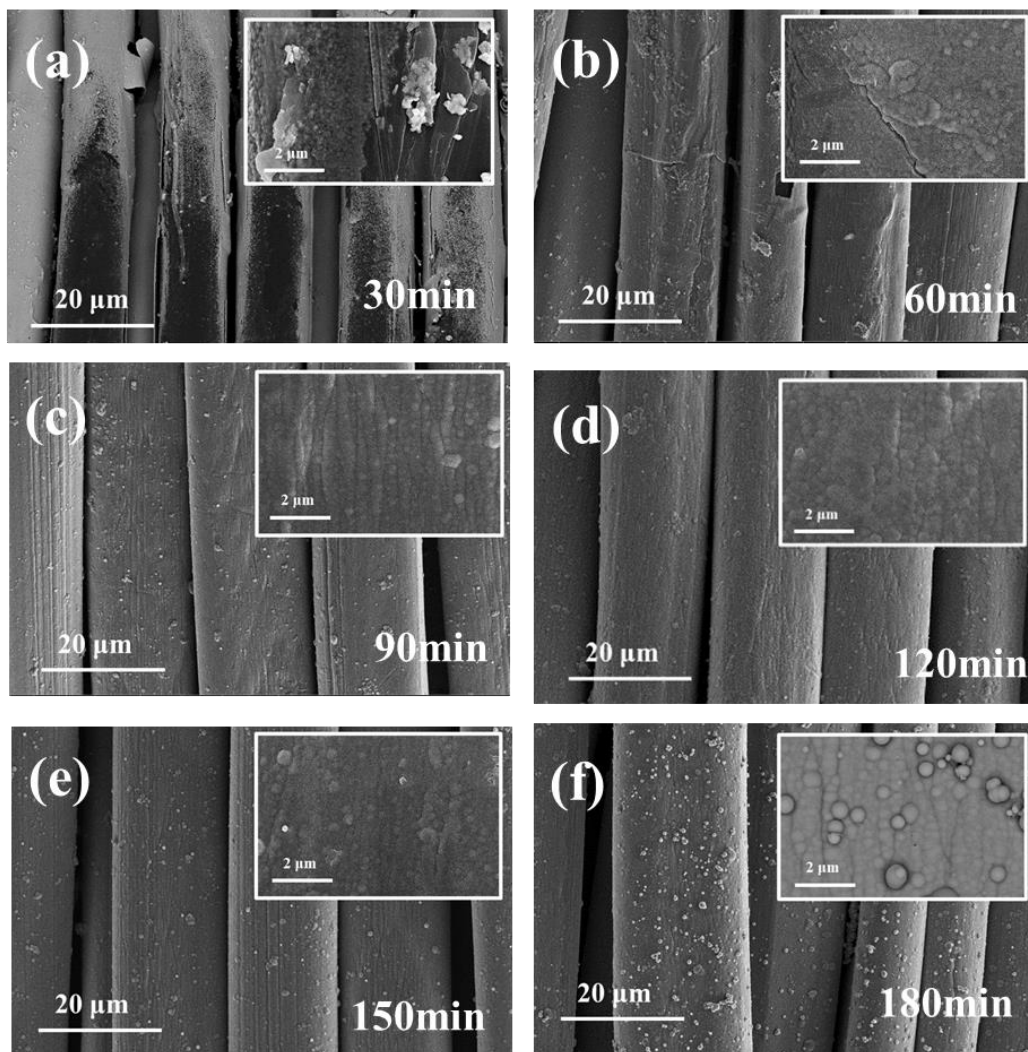

Fig. S3 SEM images of the Kevlar<sup>®</sup>@Ni-P-B fabrics at different plating times.

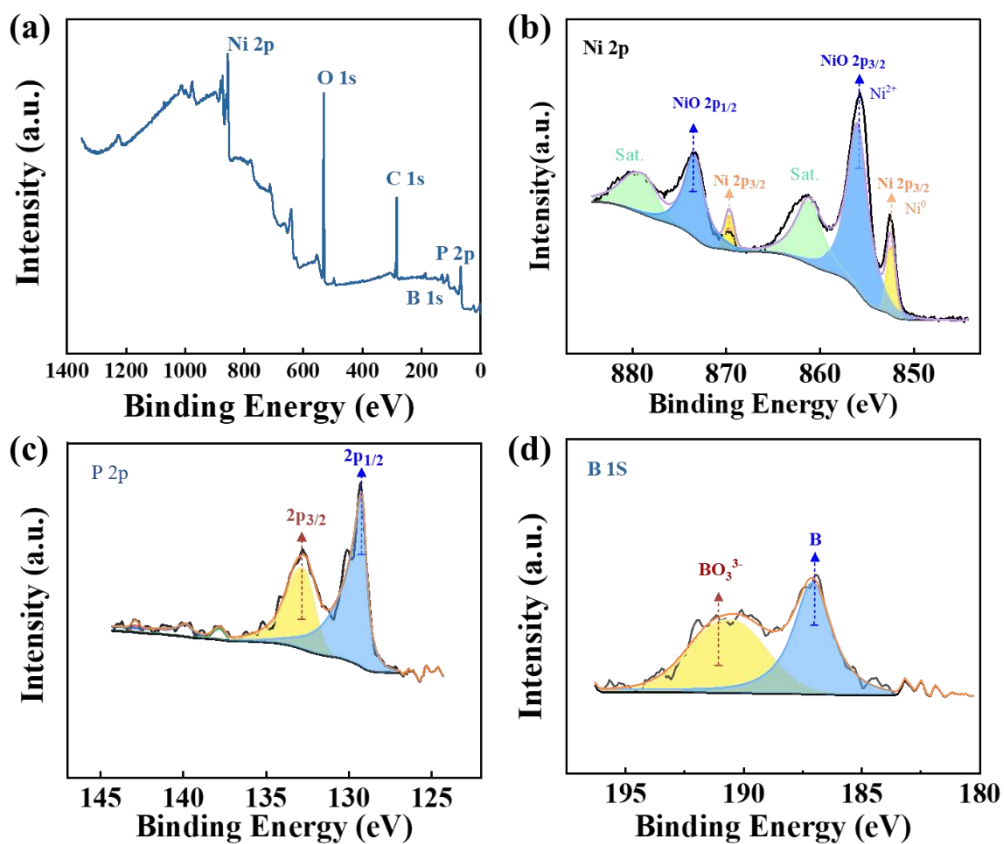

Fig. S4 XPS patterns of the Kevlar®@120-Ni-P-B fabric.

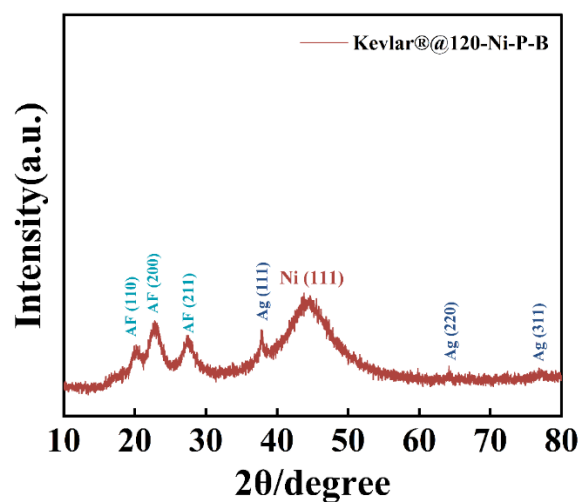

Fig. S5 XRD pattern of the Kevlar®@120-Ni-P-B fabric.

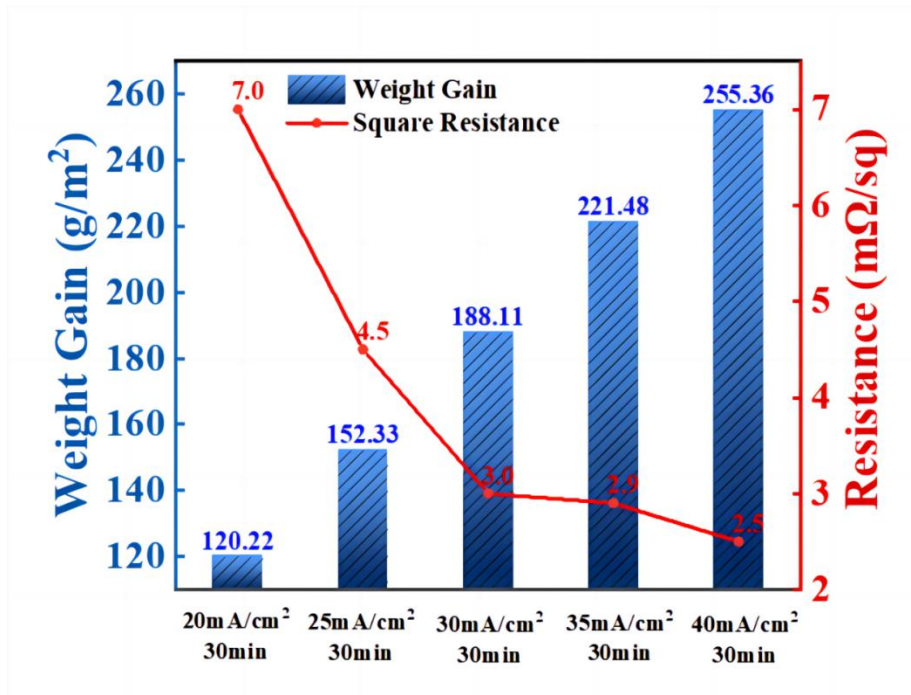

Fig. S6 Effects of current density on weight gain and electrical resistance of the Kevlar<sup>®</sup>@Ni-P-B@Cu fabric.
